# Supplementary material
Source: Springer Nature journal article supplement (https://www.springermedizin.de/resource/supplementary/13023_2014_763_MOESM7_ESM.pdf/9643020)

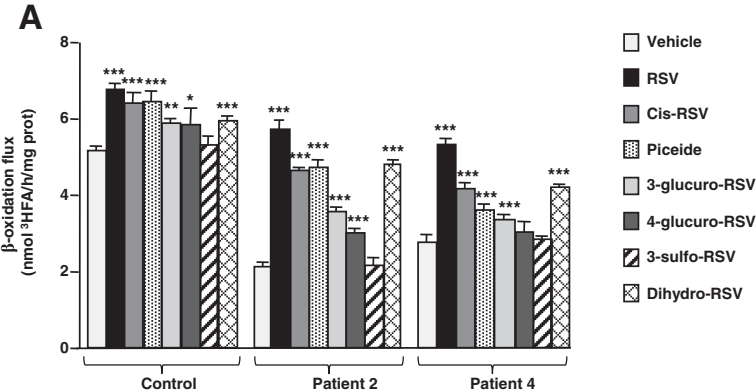

**B**

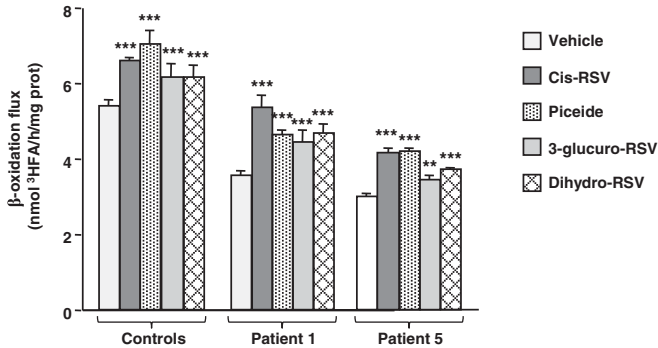

Supplement: MOESM7 [file 9643020]
